# Supplementary material for: The chemical stability and cytotoxicity of carbonyl iron particles grafted with poly(glycidyl methacrylate) and the magnetorheological activity of their suspensions
Source: Royal Society of Chemistry journal article supplement (doi:10.1039/c5ra11968e), 2015-01-01
Supplement: c5ra11968e1.pdf [file c5ra11968e1.pdf]

**The chemical stability and cytotoxicity of carbonyl iron particles grafted with poly(glycidyl methacrylate) and the magnetorheological activity of their suspensions**

*Martin Cvek,<sup>a,b</sup> Miroslav Mrlik,<sup>a,c\*</sup> Marketa Ilcikova,<sup>c,d</sup> Jaroslav Mosnacek,<sup>d</sup> Vladimir Babayan,<sup>a</sup> Zdenka Kucekova,<sup>a</sup> Petr Humpolicek,<sup>a</sup> Vladimir Pavlinek,<sup>a</sup>*

<sup>a</sup> Centre of Polymer Systems, University Institute, Tomas Bata University in Zlin, Trida T. Bati 5678, 760 01 Zlin, Czech Republic

<sup>b</sup> Polymer Centre, Faculty of Technology, Tomas Bata University in Zlin, nam. T. G. Masaryka 275, 762 72 Zlin, Czech Republic

<sup>c</sup> Center for Advanced Materials, Qatar University, P. O. Box 2713, Doha, Qatar

<sup>d</sup> Polymer Institute, Slovak Academy of Sciences, Dubravska cesta 9, 845 41 Bratislava 45, Slovakia

**Keywords:** magnetorheology, poly(glycidyl methacrylate), atom transfer radical polymerization, surface modification, chemical stability, cytotoxicity, drug targeting, steady shear

**Supporting information**

The reaction of iron in aqueous solution of hydrochloric acid proceeds [1] according to the following equation:

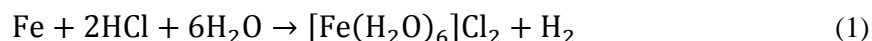

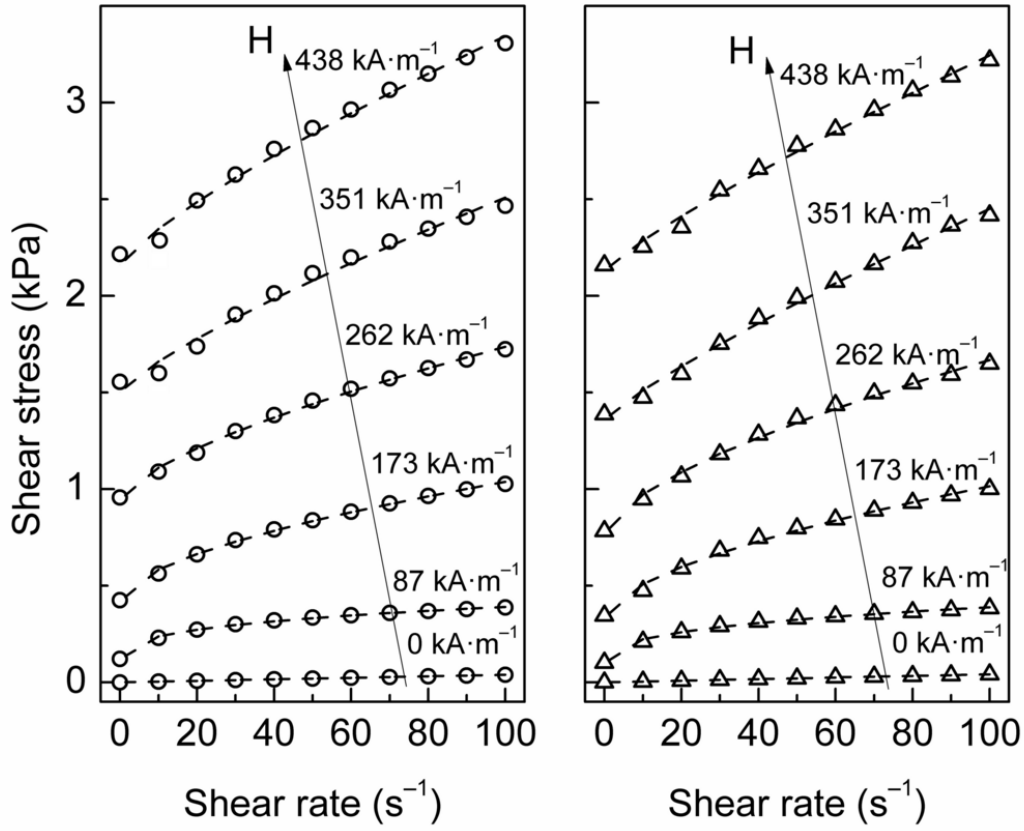

Figure S1. Rheograms of the MR suspensions containing 40 wt.% of CI-PGMA-1 particles (*open circles*), and CI-PGMA-2 particles (*open triangles*) showing experimental data fitted with the HB model (*dashed lines*) under various magnetic field strengths.

Non-linear regression was performed on Origin<sup>®</sup> (© OriginLab Corporation) curve fitting package in order to determine  $\tau_0$ ,  $K$ ,  $n$  parameters of Herschel-Bulkley (HB) model. The accuracy of HB predictions was assessed with three statistical indicators. Validity of correlation coefficient ( $R_c^2$ ), to evaluate the fit of non-linear models has been questioned [2–4], therefore the sum of square errors (SSE), and the root mean square error (RMSE) are also reported. These parameters are defined according to equations:

$$SSE = \sum_i^N (\tau_i - \tau_p)^2 \quad (2)$$

where  $\tau_i$  and  $\tau_p$  are observed and predicted shear stresses, and

$$RMSE = \sqrt{\frac{SSE}{N - p}} \quad (3)$$

where  $N$  is the number of measurements, and  $p$  denotes the number of parameters of the model. For further references see Kelessidis *et al.* [4].

Table S1. Statistical evaluation of the HB model predictions

| Magnetic field                              | 0 kA·m <sup>-1</sup> | 87 kA·m <sup>-1</sup> | 173 kA·m <sup>-1</sup> | 262 kA·m <sup>-1</sup> | 351 kA·m <sup>-1</sup> | 438 kA·m <sup>-1</sup> |
|---------------------------------------------|----------------------|-----------------------|------------------------|------------------------|------------------------|------------------------|
| <b>MR suspension of bare CI particles</b>   |                      |                       |                        |                        |                        |                        |
| $\tau_0$ [kPa]                              | 1.26e-05             | 0.120                 | 0.519                  | 1.215                  | 2.046                  | 2.941                  |
| $K$ [kPa·s <sup>n</sup> ]                   | 4.59e-04             | 0.115                 | 0.143                  | 0.091                  | 0.039                  | 0.035                  |
| $n$ [-]                                     | 0.929                | 0.258                 | 0.395                  | 0.557                  | 0.761                  | 0.782                  |
| $R_C^2$                                     | 0.999                | 0.991                 | 0.990                  | 0.998                  | 0.997                  | 0.997                  |
| SSE [kPa <sup>2</sup> ]                     | 5.04e-07             | 0.003                 | 0.013                  | 0.004                  | 0.011                  | 0.012                  |
| RMSE [kPa]                                  | 2.51e-04             | 0.020                 | 0.041                  | 0.013                  | 0.037                  | 0.039                  |
| <b>MR suspension of CI-PGMA-1 particles</b> |                      |                       |                        |                        |                        |                        |
| $\tau_0$ [kPa]                              | 1.26e-05             | 0.107                 | 0.417                  | 0.944                  | 1.503                  | 2.160                  |
| $K$ [kPa·s <sup>n</sup> ]                   | 4.36e-04             | 0.061                 | 0.044                  | 0.035                  | 0.024                  | 0.029                  |
| $n$ [-]                                     | 0.973                | 0.333                 | 0.571                  | 0.675                  | 0.804                  | 0.802                  |
| $R_C^2$                                     | 0.999                | 0.999                 | 0.999                  | 0.998                  | 0.991                  | 0.991                  |
| SSE [kPa <sup>2</sup> ]                     | 3.35e-08             | 1.45e-04              | 0.0007                 | 0.002                  | 0.020                  | 0.025                  |
| RMSE [kPa]                                  | 6.48e-05             | 0.004                 | 0.009                  | 0.016                  | 0.049                  | 0.056                  |
| <b>MR suspension of CI-PGMA-2 particles</b> |                      |                       |                        |                        |                        |                        |
| $\tau_0$ [kPa]                              | 1.26e-05             | 0.089                 | 0.332                  | 0.768                  | 1.359                  | 2.130                  |
| $K$ [kPa·s <sup>n</sup> ]                   | 4.63e-04             | 0.060                 | 0.045                  | 0.046                  | 0.021                  | 0.021                  |
| $n$ [-]                                     | 0.971                | 0.347                 | 0.587                  | 0.642                  | 0.854                  | 0.853                  |
| $R_C^2$                                     | 0.999                | 0.998                 | 0.998                  | 0.998                  | 0.997                  | 0.997                  |
| SSE [kPa <sup>2</sup> ]                     | 5.81e-08             | 3.36e-04              | 0.002                  | 0.003                  | 0.007                  | 0.008                  |
| RMSE [kPa]                                  | 8.52e-05             | 0.007                 | 0.017                  | 0.020                  | 0.029                  | 0.032                  |

Computed parameters confirmed almost Newtonian behavior of all magnetorheological (MR) suspensions in the off-state, thus behavior with almost zero yield stress and non-Newtonian index close to 1. However, after the application of an external magnetic field, yield stress appeared and pseudoplasticity occurred, as supported by corresponding parameters. High values of  $R_C^2$  for all data samples, and generally low values of SSE and RMSE in majority of the cases (Table S1) indicate that the experimental data are in a very good agreement with HB model predictions. To conclude, considering these results, the HB model appeared to be a reliable analysis tool for flow curve fitting of prepared MR suspensions.

## References

- [1] Sedlacik, M.; Pavlinek, V. A tensiometric study of magnetorheological suspensions' stability. *RSC Adv.* **2014**, *4*, 58377.
- [2] Helland, I. S. On the interpretation and use of  $R^2$  in regression analysis. *Biometrics.* **1987**, *43*, 61–69.
- [3] Bailey, W. J.; Weir, I. S. Investigation of methods for direct rheological model parameter estimation. *Journal of Petroleum Science and Engineering.* **1998**, *21*, 1–13.
- [4] Kelessidis, V. C.; Maglione, R. Modeling rheological behavior of bentonite suspensions as Casson and Robertson–Stiff fluids using Newtonian and true shear rates in Couette viscometry. *Powder Technology.* **2006**, *168*, 134–147.
